# Supplementary material for: In Vivo MRI Tracking of Mesenchymal Stromal Cells Labeled with Ultrasmall Paramagnetic Iron Oxide Particles after Intramyocardial Transplantation in Patients with Chronic Ischemic Heart Disease
Source: Hindawi journal article supplement (doi:10.1155/2019/2754927), 2019-11-14
Supplement: f1 [file 2754927.f1.pdf]

## Supplemental Material

**Table S1: Inclusion and exclusion criteria**

---

| <b>Inclusion criteria</b>                                                                                                                                                                                                                                                                                                                                                                                                                                                                                                                                                                                                                                                                                                                                                                                                                                                                                                                                                                                                         |
|-----------------------------------------------------------------------------------------------------------------------------------------------------------------------------------------------------------------------------------------------------------------------------------------------------------------------------------------------------------------------------------------------------------------------------------------------------------------------------------------------------------------------------------------------------------------------------------------------------------------------------------------------------------------------------------------------------------------------------------------------------------------------------------------------------------------------------------------------------------------------------------------------------------------------------------------------------------------------------------------------------------------------------------|
| <ul style="list-style-type: none"><li>• Age between 30 and 80 years.</li><li>• Signed informed consent.</li><li>• Chronic stable ischemic heart disease</li><li>• NYHA class II-IV or CCS class II-IV</li><li>• Maximal tolerable angina and/or heart failure medication.</li><li>• Angiography within 12 months of inclusion. Angiography must have at least one larger coronary vessel with a significant stenosis with no option for PCI or CABG (Angiographies evaluated by an independent thoracic surgeon and an interventional cardiologist).</li><li>• Patients who have had PCI or CABG within 6 months of inclusion must have a new angiography at least 4 months after the intervention to rule out early restenosis.</li></ul>                                                                                                                                                                                                                                                                                        |
| <b>Exclusion criteria</b>                                                                                                                                                                                                                                                                                                                                                                                                                                                                                                                                                                                                                                                                                                                                                                                                                                                                                                                                                                                                         |
| <ul style="list-style-type: none"><li>• Pregnant or fertile women.</li><li>• Clinical significant anemia, leukopenia, leukocytosis or thrombocytopenia.</li><li>• Diminished functional capacity for other reasons such as: COPD with FEV1&lt;1 L/min, moderate to severe claudication or morbid obesity.</li><li>• Patients with reduced immune response or treated with immunosuppressive medication.</li><li>• Moderate to severe valvular disease or valvular disease with option for valvular surgery.</li><li>• Acute coronary syndrome with elevation of CKMB or troponins, stroke or TCI within 6 weeks of inclusion.</li><li>• History with malignant disease within 5 years of inclusion or suspected malignancy.</li><li>• Other experimental treatment within 4 weeks of baseline evaluation.</li><li>• Other revascularization treatment within 4 months of treatment.</li><li>• Contraindications for MRI such as: Claustrophobia, pacemaker, ICD unit, metal fragments or metal implants in the cranium.</li></ul> |

---

NYHA = New York Heart Association, CCS = Canadian Cardiovascular Society, PCI = percutaneous coronary intervention, CABG = coronary artery bypass grafting, COPD = chronic obstructive pulmonary disease, FEV1 = forced expiratory volume during first second, CKMB = creatine kinase myocardial band, TCI = Transitory cerebral ischemia, ICD = implantable cardioverter defibrillator.

**Table S2: Summary of events**

|                             | Baseline | D-1 | D0 | D1 | D3 | D7 | W2 | W4 | W8 | W12 | W26 |
|-----------------------------|----------|-----|----|----|----|----|----|----|----|-----|-----|
| Informed consent            | •        |     |    |    |    |    |    |    |    |     |     |
| History / physical exam     | •        | •   |    | •  | •  | •  | •  | •  | •  | •   | •   |
| Laboratories                | •        | •   | •  | •  |    |    |    | •  | •  | •   | •   |
| NYHA                        | •        |     |    |    |    |    |    | •  | •  | •   | •   |
| CCS                         | •        |     |    |    |    |    |    | •  | •  | •   | •   |
| SAQ                         | •        |     |    |    |    |    |    |    |    | •   | •   |
| MRI                         | •        |     | •  | •  | •  | •  | •  | •  | •  | •   | •   |
| Bone marrow aspiration      | •        |     |    |    |    |    |    |    |    |     |     |
| MSC isolation and expansion | •        |     |    |    |    |    |    |    |    |     |     |
| USPIO labeling              |          | •   |    |    |    |    |    |    |    |     |     |
| NOGA Mapping                |          |     | •  |    |    |    |    |    |    |     |     |
| Holter monitoring           |          | •   | •  | •  |    |    |    |    |    |     |     |
| Adverse events evaluation   |          |     | •  | •  | •  | •  | •  | •  | •  | •   | •   |

NYHA = New York Heart Association, CCS = Canadian Cardiovascular Society, SAQ = Seattle Angina Questionnaire, MRI = Magnetic resonance imaging, MSC = Mesenchymal stromal cell, USPIO = Ultra-small paramagnetic iron-oxide

**Table S3: Baseline Characteristics**

| Parameter                | Data       |
|--------------------------|------------|
| Age (years)              | 62 ± 7     |
| Sex (male)               | 5 (100)    |
| BMI (kg/m <sup>2</sup> ) | 28.7 ± 3.4 |
| LVEF (%)                 | 41.6 ± 6.6 |
| NYHA Class               | 2.2 ± 0.4  |
| CCS Class                | 1.8 ± 0.4  |
| Previous MI              | 5 (100)    |
| Previous PCI             | 5 (100)    |
| Previous CABG            | 5 (100)    |
| Diabetes                 | 3 (60)     |
| Hypertension             | 4 (80)     |

SD = standard deviation, BMI = body mass index, LVEF = left ventricular ejection fraction, NYHA = New York Heart Association, CCS = Canadian Cardiovascular Society, MI = myocardial Infarction, PCI = percutaneous coronary intervention, CABG = coronary artery by-pass grafting

Values are mean ± SD or number (%).

**Table S4: Supplemental results**

| <b>Parameter</b> | <b>Baseline</b> | <b>3 months</b> | <b>6 months</b> | <b>p-value</b> |
|------------------|-----------------|-----------------|-----------------|----------------|
| EDV (mL)         | 189 ± 29        | 184 ± 20        | 183 ± 21        | 0.55           |
| ESV (mL)         | 111 ± 21        | 102 ± 19        | 90 ± 22         | 0.007          |
| LVEF (%)         | 41.5 ± 6.7      | 44.6 ± 8.2      | 50.8 ± 9.4      | 0.015          |
| SV (mL)          | 78 ± 17         | 82 ± 17         | 93 ± 18         | 0.07           |
| CCS Class        | 1.8 ± 0.4       | 0.4 ± 0.5       | 0.2 ± 0.4       | 0.009          |
| NYHA Class       | 2.2 ± 0.4       | 1.8 ± 0.8       | 1.6 ± 0.9       | 0.10           |
| SAQ – QoL score  | 57 ± 19         | 65 ± 27         | 70 ± 22         | 0.14           |

EDV = end diastolic volume, ESV = end systolic volume, LVEF = left ventricular ejection fraction, SV = stroke volume, NYHA = New York Heart Association, CCS = Canadian Cardiovascular Society, SAQ = Seattle Angina Questionnaire, QoL = quality of life

All values are mean ± standard deviation.
